# Supplementary material for: Effects of repetitive peripheral magnetic stimulation vs. conventional therapy in the management of carpal tunnel syndrome: a pilot randomized controlled trial
Source: PeerJ journal article supplement (doi:10.7717/peerj.15398), 2023-05-18
Supplement: TCTR20200828002.pdf [file TCTR20200828002.pdf]

**TCTR ID : TCTR20200828002**

Overall Recruitment Status : Completed (Has Results)

**OTHER ID :**

Prospective registration  
This protocol was registered before enrollment of the first participant.

---

**Tracking Information**

First Submitted Date : 23 August 2020  
First Posted Date : 28 August 2020  
Last Update Posted Date : 11 November 2022

---

**Title**

Public Title : Comparison of the effectiveness between Peripheral Repetitive Magnetic Stimulation and Conventional Therapy in Carpal Tunnel Syndrome: a pilot randomized controlled trial  
Acronym : RPMS  
Scientific Title : Comparison of the effectiveness between Peripheral Repetitive Magnetic Stimulation and Conventional Therapy in Carpal Tunnel Syndrome: a pilot randomized controlled trial  
Sponsor ID/ IRB ID/ EC ID : HE621319  
Registration Site : Thai Clinical Trials Registry  
URL : <https://www.thaiclinicaltrials.org/show/TCTR20200828002>  
Secondary ID : No Secondary ID

---

**Ethics Review**

1. Board Approval : Submitted, approved  
Approval Number : HE621319  
Date of Approval : No Data  
Board Name : Khon Kaen University Ethics Committee of Human Research  
Board Affiliation : Khon Kaen University, Thailand  
Board Contact : Business Phone : +66+43+366616 Ext. -  
Business Email : eckku@kku.ac.th  
Business Address : Khon Kaen University Ethics Committee of Human Research 123 Friendship Road  
Khon Kaen University, 40002 Thailand

---

**Sponsor**

Source(s) of Monetary or Material Supports : Khon Kaen University, faculty of medicine  
Study Primary Sponsor : General Research Grant  
Responsible Party : Name/Official Title : Faculty of medicine  
Organization : General Research Grant  
Phone : 043348360 Ext. No Data  
Email : sureesri289@gmail.com  
Study Secondary Sponsor : No Study Secondary Sponsor

---

**Protocol Synopsis**

Protocol Synopsis : Peripheral nerve repetitive magnetic stimulation is a new physical agent that can be used to relieve pain and to recover hand function. The aim of this study was to evaluate the therapeutic effects of peripheral repetitive magnetic stimulation in carpal tunnel syndrome. Carpal tunnel syndrome is the most common entrapment neuropathy in the upper extremities. In non-severe case, conservative treatment is the wide range therapeutic options. Peripheral nerve repetitive magnetic stimulation is a new noninvasive physical agent that can be used as conservative treatment in non-severe carpal tunnel syndrome. We will investigate the effect of Peripheral nerve repetitive magnetic stimulation compared with conservative treatment on improving symptom and hand function in mild to moderate carpal tunnel syndrome. The outcome-measuring tool are Thai version Boston Questionnaire to evaluate severity of symptoms and the degree of manual skill, nerve conduction study and pinch strength.

URL not available

---

**Health Conditions**

Health Condition(s) or Problem(s) Studied : severe degree of carpal tunnel syndrome

Keywords : carpal tunnel syndrome Peripheral Repetitive Magnetic Stimulation

---

### Eligibility

Inclusion Criteria : The study included patients with age above 18 years with electrophysiological proof of having carpal tunnel syndrome (mild to moderate degree)

Gender : Both

Age Limit : Minimum : 18 Years Maximum : N/A (No limit)

Exclusion Criteria : 1. Patients with history of surgical release of carpal tunnel  
2. Patients with previous wrist fracture or wrist dislocation  
3. Patients with underlying disease such as diabetes mellitus, hyperthyroidism and hypothyroidism and rheumatoid arthritis.  
4. Patients with history suggestive of any neurological disease such as polyneuropathy, cervical radiculopathy, ulnar neuropathy  
5. Patients with magnetic Stimulate contraindication such as installing pacemakers, cochlear implant or intracranial metal objects, pregnant females or those who are not consenting for the procedures.

Accept Healthy Volunteers : No

---

### Status

Overall Recruitment Status : Completed

Key Trial Dates Study Start Date (First enrollment) : 01 September 2020 Indicate Type : Actual

Completion Date (Last subject, Last visit) : 11 January 2021 Indicate Type : Actual

Study Completion Date : 25 January 2021 Indicate Type : Actual

---

### Design

Study Type : Interventional

Primary Purpose : Treatment

Study Phase : Phase 2

Intervention Model : Parallel

Number of Arms : 2

Masking :

Allocation : Randomized

Control : Placebo

Study Endpoint Classification : Safety/Efficacy Study

Sample size

Planned sample size : 24

Actual sample size at study completion :

Intervention Arm 1

Intervention name : Repetitive Peripheral Magnetic Stimulation

Intervention Type : Experimental

Intervention Classification : Device

Intervention Description : Participant will have 5 sessions of Peripheral Repetitive Magnetic Stimulation with the coil located at the wrist. The magnetic stimulation protocol consisted in 100 trains of 10 pulses/train, delivered at 10 Hz

Intervention Arm 2

Intervention name : Conventional Therapy

Intervention Type : No Intervention

Intervention Classification : Behavioral

Intervention Description : Tendon Gliding exercises and avoidance of wrist postures (i.e., prolonged wrist flexion) or repetitive wrist motions

---

### Outcome

#### Primary Outcome

1. Outcome Name : symptom and functional severity

Metric / Method of measurement : Thai Version Boston Questionnaire

Time point : 2 weeks after end of the intervention

**Secondary Outcome**

1. Outcome Name : pinch strength

Metric / Method of measurement : using pinch gauges to measure strength

Time point : 2 weeks after end of the intervention

---

**Location**

**Section A : Central Contact**

|                        |                                        |               |                                                                                           |
|------------------------|----------------------------------------|---------------|-------------------------------------------------------------------------------------------|
| Central Contact        | First Name : Arachaphon<br>Degree : MD | Middle Name : | Last Name : Panathoop<br>Phone : 0650564147 Ext. : No Data<br>Email : aracha818@gmail.com |
| Central Contact Backup | First Name : Ratana<br>Degree : MD     | Middle Name : | Lastname : Vichiansiri<br>Phone : 0810525610 Ext. : No Data<br>Email : vratana@kku.ac.th  |

**Section B Facility Information and Contact**

1. Site Name : Faculty of Medicine

City : Mueang Khon Kaen      State/Province : Khon Kaen      Postal Code : 40000  
Country : Thailand      Recruitment Status : Pending (Not yet recruiting)

**Facility Contact** First Name : Arachaphon      Middle Name :      Last Name : Panathoop  
Degree : MD      Phone : 0987502218 Ext. : No Data      Email : aracha818@gmail.com

**Facility Contact Backup** First Name : Ratana      Middle Name :      Last Name : Vichiansiri  
Degree : MD      Phone : +66 43-348392 Ext. : No Data      Email : vratana@kku.ac.th

**Investigator Name** First Name : Arachaphon      Middle Name :      Last Name : Panathoop  
Degree : MD      Role : Principal Investigator

**Section C : Contact for Public Queries (Responsible Person)**

First Name : Arachaphon      Middle Name :      Last Name : Panathoop  
Degree : MD      Phone : 0650564147 Ext. : No Data      Email : aracha818@gmail.com  
Postal Address : 123 Mittraphap Rd, Mueang Khon Kaen District  
State/Province : Khon kaen      Postal Code : 40000  
Country : Thailand      Official Role : Study Principal Investigator  
Organization Affiliation : Faculty of medicine, Khon Kean University

**Section D : Contact for Scientific Queries (Responsible Person)**

First Name : Arachaphon      Middle Name :      Last Name : Panathoop  
Degree : MD      Phone : 0650564147 Ext. : No Data      Email : aracha818@gmail.com  
Postal Address : 123 Mittraphap Rd, Mueang Khon Kaen District  
State/Province : Khon kaen      Postal Code : 40000  
Country : Thailand      Official Role : Study Principal Investigator  
Organization Affiliation : Faculty of medicine, Khon Kean University

---

**Summary Results**

Date of posting of results summaries : 27 October 2022

Date of first journal publication of results : Not yet published

**Baseline Characteristics :** In rPMS group, their average age was 49.3 (SD 10.8) years. Most of them were female (91.7%). The average age in control group was 52.3 (SD 7.1) years and 66.7 % were female. Median duration of working time in rPMS and control were 8 hours/day, 7 hours /day respectively. Median duration of CTS symptom in rPMS group was 4 months and in control group was 3.5 months

**Participant Flow :** A total of 24 participants were enrolled in this study. There were divided into 2 groups of 12 equal participants each.

**Adverse events :** No unfavorable change in the health of a participant and all serious adverse events

**Outcome Measures :** Only rPMS group showed significant improvement in the 2 week-outcome including symptom severity scores (SSS) determined by Thai version Boston Questionnaire and pinch strength. For the nerve conduction study, only rPMS showed a significant increment in SNAP amplitude of median nerve. Although some improvements were found in symptom severity score and SNAP amplitude but these did not reach statistically significant level. There was no statistically significant difference when compared all final outcomes between two groups

Brief Summary of Results : The rPMS group showed significantly greater within group improvement in symptom severity scores and pinch strength. Regarding electrodiagnostic parameters, sensory nerve action potential amplitude was significantly increased within group treated with rPMS. There was no statistically significant within group difference in conventional therapy. Although overall changes in PMS group were of greater magnitude, no statistically significant difference was found when comparing between groups.

---

**Deidentified Individual Participant-level Data Sharing**

Plan to share IPD : Yes

Plan description : European Journal of Physical and Rehabilitation Medicine and registered under number Eur J Phys Rehabil Med-7768

---

**Publication from this study**

MEDLINE Identifier : No Data

URL link to full text publication : No Data

---
